# Supplementary material for: Prolonged Survival after Recurrence in HCC Resected Patients Using Repeated Curative Therapies: Never Give Up!
Source: MDPI journal article supplement (doi:10.3390/cancers15010232), 2022-12-30
Supplement: s1 [file s1]

Supplementary Materials

# Prolonged Survival after Recurrence in HCC Resected Patients Using Repeated Curative Therapies: Never Give Up!

Cyprien Toubert, Boris Guiu, Bader Al Taweel, Eric Assenat, Fabrizio Panaro, François-Regis Souche, Jose Ursic-Bedoya, Francis Navarro and Astrid Herrero

**Table S1.** cut-off of early versus late recurrence using “minimum-*p*-value” method.

| Cut-Off (Months After Initial Surgery) | Early Recurrence Group |                       | Late Recurrence Group |                         |
|----------------------------------------|------------------------|-----------------------|-----------------------|-------------------------|
|                                        | Median SAR             | Median SAR difference | Median SAR            | <i>p</i> -value for SAR |
| 1                                      | 3                      | 24                    | 27                    | 0.285                   |
| 3                                      | 13                     | 16                    | 29                    | 0.004                   |
| 5                                      | 18                     | 14                    | 32                    | 0.006                   |
| 7                                      | 17                     | 18                    | 35                    | 0.003                   |
| 9                                      | 17                     | 21                    | 38                    | 0.007                   |
| 11                                     | 17                     | 23                    | 40                    | 0.003                   |
| 13                                     | 18                     | 22                    | 40                    | 0.004                   |
| 15                                     | 19                     | 21                    | 40                    | 0.011                   |
| 17                                     | 19                     | 21                    | 40                    | 0.009                   |
| 19                                     | 22                     | 14                    | 36                    | 0.094                   |
| 21                                     | 23                     | 0                     | 23                    | 0.198                   |
| 23                                     | 23                     | 11                    | 34                    | 0.445                   |

SAR: Survival after recurrence .
